# Supplementary material for: First principles study of electrocatalytic behavior of olivine phosphates with mixed alkali and mixed transition metal atoms
Source: Royal Society of Chemistry journal article supplement (doi:10.1039/d0ra02577a), 2020-01-01
Supplement: d0ra02577a1.pdf [file d0ra02577a1.pdf]

Electronic Supplementary Information

**First Principle Study of Electrocatalytic  
Behavior of Olivine Phosphates with Mixed  
Alkali and Mixed Transition Metal Atoms**

Arup Chakraborty,<sup>1</sup> Sooraj Kunnikuruvan,<sup>1</sup> David Zitoun,<sup>1</sup> Dan T. Major<sup>1,\*</sup>

<sup>1</sup> *Department of Chemistry and Institute for Nanotechnology & Advanced Materials, Bar-Ilan University, Ramat-Gan 52900, Israel*

**Table S1** Energy difference between ferromagnetic (FM) and antiferromagnetic (AFM) configurations of Ni atoms in bulk  $\text{LiNiPO}_4$ .

| Configuration           | FM    | AFM1<br>(C-type) | AFM2<br>(A-type) | AFM3<br>(G-type) |
|-------------------------|-------|------------------|------------------|------------------|
| Relative energy<br>(eV) | 0.000 | -0.028           | -0.006           | -0.021           |

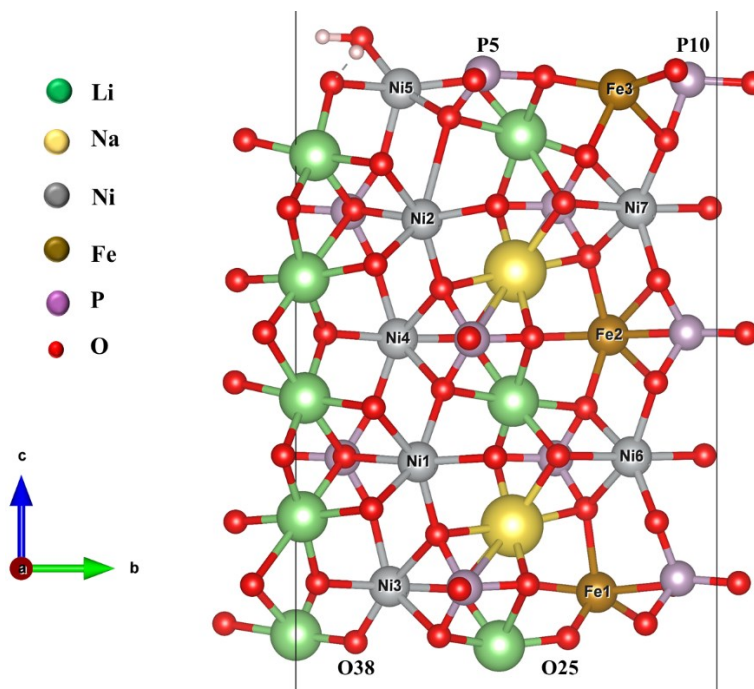

**Figure S1** (010) surface slab model for  $\text{Li}_{0.8}\text{Na}_{0.2}\text{Ni}_{0.7}\text{Fe}_{0.3}\text{PO}_4$  with a water molecule attached at Ni-site. Slab is confined along  $c$ -direction.

**Table S2** Relative formation energy (eV) of Na doping at Li and Ni sites of  $\text{LiNiPO}_4$ .

| Na at Li site<br>( $\text{Li}_{0.75}\text{Na}_{0.25}\text{NiPO}_4$ ) | Na at Ni site<br>( $\text{LiNa}_{0.25}\text{Ni}_{0.75}\text{PO}_4$ ) |
|----------------------------------------------------------------------|----------------------------------------------------------------------|
| 0.000                                                                | 1.039                                                                |

**Table S3** Bader charges for selected atoms in  $\text{Li}_{0.8}\text{Na}_{0.2}\text{Ni}_{0.7}\text{Fe}_{0.3}\text{PO}_4$  without and with Li-vacancies. Atom numbers in this table are the same as in Figure S1.

| Atomic site      | Bare surface of $\text{Li}_{0.8}\text{Na}_{0.2}\text{Ni}_{0.7}\text{Fe}_{0.3}\text{PO}_4$ | Bare surface of $\text{Li}_{0.6}\text{Na}_{0.2}\text{Ni}_{0.7}\text{Fe}_{0.3}\text{PO}_4$ | Water attached to the Ni-site of $\text{Li}_{0.8}\text{Na}_{0.2}\text{Ni}_{0.7}\text{Fe}_{0.3}\text{PO}_4$ | Water attached to the Ni-site of $\text{Li}_{0.6}\text{Na}_{0.2}\text{Ni}_{0.7}\text{Fe}_{0.3}\text{PO}_4$ | Water attached to the Fe-site of $\text{Li}_{0.8}\text{Na}_{0.2}\text{Ni}_{0.7}\text{Fe}_{0.3}\text{PO}_4$ | Water attached to the Fe-site of $\text{Li}_{0.6}\text{Na}_{0.2}\text{Ni}_{0.7}\text{Fe}_{0.3}\text{PO}_4$ |
|------------------|-------------------------------------------------------------------------------------------|-------------------------------------------------------------------------------------------|------------------------------------------------------------------------------------------------------------|------------------------------------------------------------------------------------------------------------|------------------------------------------------------------------------------------------------------------|------------------------------------------------------------------------------------------------------------|
| Fe3 (at the top) | 1.375                                                                                     | 1.361                                                                                     | 1.339                                                                                                      | 1.384                                                                                                      | 1.412                                                                                                      | 1.440                                                                                                      |
| Fe1              | 1.715                                                                                     | 1.690                                                                                     | 1.724                                                                                                      | 1.703                                                                                                      | 1.716                                                                                                      | 1.733                                                                                                      |
| Ni5 (at the top) | 1.203                                                                                     | 1.306                                                                                     | 1.291                                                                                                      | 1.315                                                                                                      | 1.188                                                                                                      | 1.276                                                                                                      |
| Ni3              | 1.296                                                                                     | 1.282                                                                                     | 1.290                                                                                                      | 1.291                                                                                                      | 1.295                                                                                                      | 1.293                                                                                                      |
| Fe2              | 1.427                                                                                     | 1.834                                                                                     | 1.427                                                                                                      | 1.832                                                                                                      | 1.424                                                                                                      | 1.421                                                                                                      |
| P5               | 2.349                                                                                     | 3.617                                                                                     | 2.770                                                                                                      | 3.596                                                                                                      | 2.330                                                                                                      | 2.921                                                                                                      |
| P10              | 2.761                                                                                     | 2.481                                                                                     | 2.359                                                                                                      | 2.440                                                                                                      | 2.715                                                                                                      | 3.640                                                                                                      |
| O25              | 0.867                                                                                     | 0.903                                                                                     | 0.867                                                                                                      | 0.909                                                                                                      | 0.685                                                                                                      | 0.853                                                                                                      |
| O38              | 0.620                                                                                     | 0.702                                                                                     | 0.645                                                                                                      | 0.664                                                                                                      | 0.627                                                                                                      | 0.624                                                                                                      |

**Table S4** Bader charges for selected atoms in  $\text{LiNi}_{0.7}\text{Fe}_{0.3}\text{PO}_4$  without and with Li-vacancies. Atom numbers in this table are the same as in Figure S1.

| Atomic site      | Bare surface of $\text{LiNi}_{0.7}\text{Fe}_{0.3}\text{PO}_4$ | Bare surface of $\text{Li}_{0.8}\text{Ni}_{0.7}\text{Fe}_{0.3}\text{PO}_4$ | Water attached to the Ni-site of $\text{LiNi}_{0.7}\text{Fe}_{0.3}\text{PO}_4$ | Water attached to the Ni-site of $\text{Li}_{0.8}\text{Ni}_{0.7}\text{Fe}_{0.3}\text{PO}_4$ | Water attached to the Fe-site of $\text{LiNi}_{0.7}\text{Fe}_{0.3}\text{PO}_4$ | Water attached to the Fe-site of $\text{Li}_{0.8}\text{Ni}_{0.7}\text{Fe}_{0.3}\text{PO}_4$ |
|------------------|---------------------------------------------------------------|----------------------------------------------------------------------------|--------------------------------------------------------------------------------|---------------------------------------------------------------------------------------------|--------------------------------------------------------------------------------|---------------------------------------------------------------------------------------------|
| Fe3 (at the top) | 1.571                                                         | 1.356                                                                      | 1.333                                                                          | 1.346                                                                                       | 1.406                                                                          | 1.439                                                                                       |
| Fe1              | 1.390                                                         | 1.682                                                                      | 1.705                                                                          | 1.689                                                                                       | 1.709                                                                          | 1.598                                                                                       |

|                           |       |       |       |       |       |       |
|---------------------------|-------|-------|-------|-------|-------|-------|
| Ni5<br>(at<br>the<br>top) | 1.164 | 1.315 | 1.284 | 1.317 | 1.170 | 1.207 |
| Ni3                       | 1.292 | 1.29  | 1.292 | 1.29  | 1.291 | 1.285 |
| Fe2                       | 1.429 | 1.829 | 1.427 | 1.832 | 1.427 | 1.837 |
| P5                        | 2.440 | 3.628 | 2.764 | 3.605 | 2.349 | 2.867 |
| P10                       | 2.765 | 2.511 | 2.342 | 2.459 | 2.761 | 2.886 |
| O25                       | 0.725 | 0.907 | 0.832 | 0.885 | 0.817 | 0.790 |
| O38                       | 0.653 | 0.665 | 0.653 | 0.656 | 0.657 | 0.708 |

**Table S5.** Comparison of adsorption energy and overpotential for the olivine phosphates with mixed alkali and TM atoms.

| Theoretical<br>composition                                                | Experimental<br>composition                                               | Calculated<br>$\Delta E_{ads}$ (eV) | Overpotential (V)                          |
|---------------------------------------------------------------------------|---------------------------------------------------------------------------|-------------------------------------|--------------------------------------------|
| $\text{LiNi}_{0.8}\text{Co}_{0.2}\text{PO}_4$                             | $\text{LiNi}_{0.8}\text{Co}_{0.2}\text{PO}_4$                             | -0.123                              | 0.54<br>(1 M KOH)<br>[Ref. <sup>1</sup> ]  |
| $\text{LiNi}_{0.9}\text{Fe}_{0.1}\text{PO}_4$                             | $\text{LiNi}_{0.9}\text{Fe}_{0.1}\text{PO}_4$                             | -0.767                              | 0.43<br>(1 M KOH)<br>[Ref. <sup>1</sup> ]  |
| $\text{LiNi}_{0.7}\text{Fe}_{0.3}\text{PO}_4$                             | $\text{LiNi}_{0.75}\text{Fe}_{0.25}\text{PO}_4$                           | - 0.817                             | 0.295<br>(1 M KOH)<br>[Ref. <sup>2</sup> ] |
| $\text{Li}_{0.6}\text{Na}_{0.2}\text{Ni}_{0.7}\text{Fe}_{0.3}\text{PO}_4$ | $\text{Li}_{0.6}\text{Na}_{0.2}\text{Ni}_{0.7}\text{Fe}_{0.1}\text{PO}_4$ | -1.309                              | 0.280<br>(6 M KOH)<br>[Ref. <sup>1</sup> ] |

## References

1. Y. Gershinsky, M. Zysler, V. Shokhen, Y. Stone and D. Zitoun, *ACS Catal.*, 2019, **9**, 8355-8363.
2. S. Ma, Q. Zhu, L. Chen, W. Wang and D. Chen, *J. Mater. Chem. A*, 2016, **4**, 8149-8154.
